# Supplementary material for: Circulating microbial content in myeloid malignancy patients is associated with disease subtypes and patient outcomes
Source: PubMed Central journal article supplement (PMC8873459; doi:10.1038/s41467-022-28678-x), 2022-02-24
Supplement: 41467_2022_28678_MOESM3_ESM.pdf [file 41467_2022_28678_MOESM3_ESM.pdf]

## **Description of Additional Supplementary Files**

**Supplementary Data 1:** Sample-level read depths

**Supplementary Data 2:** Taxa removed from consideration

**Supplementary Data 3:** Putative EBV integration sites
